# Supplementary material for: Effects of curcumin on retinal oxidative stress and inflammation in diabetes
Source: Springer Nature journal article supplement (doi:10.1186/1743-7075-4-8), 2007-01-01

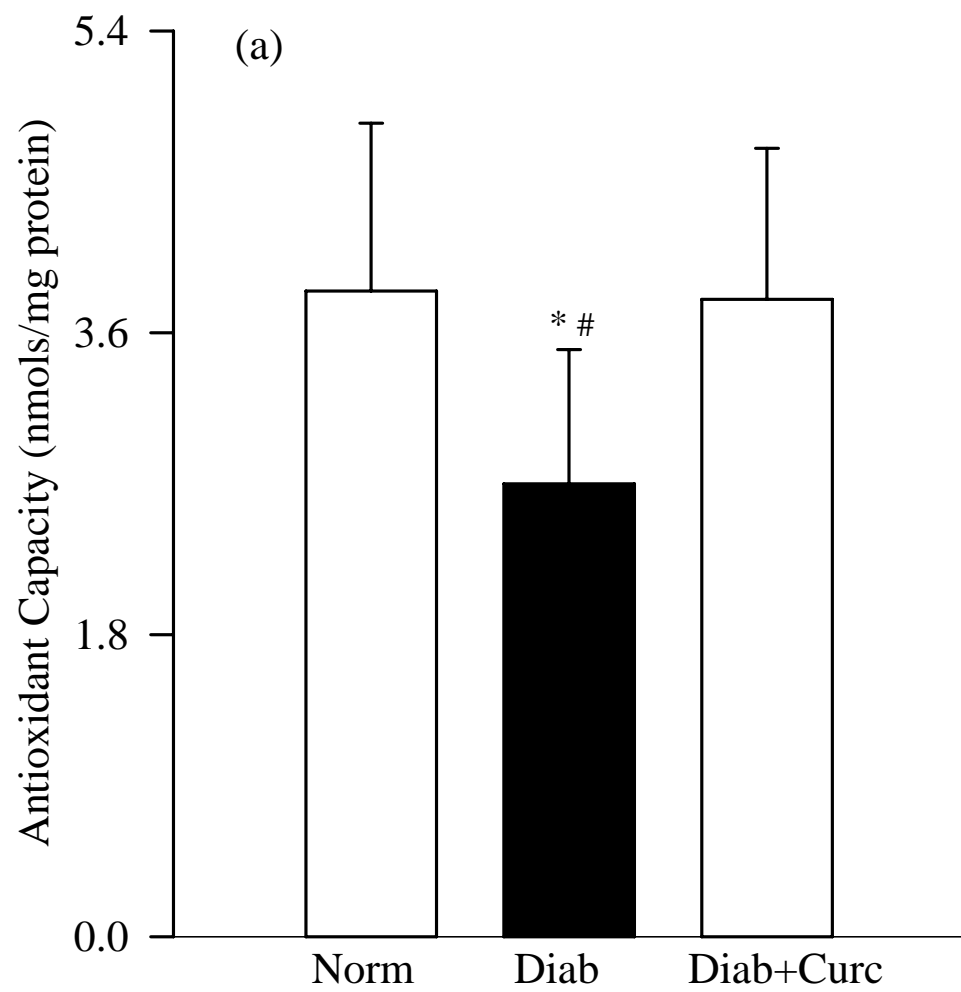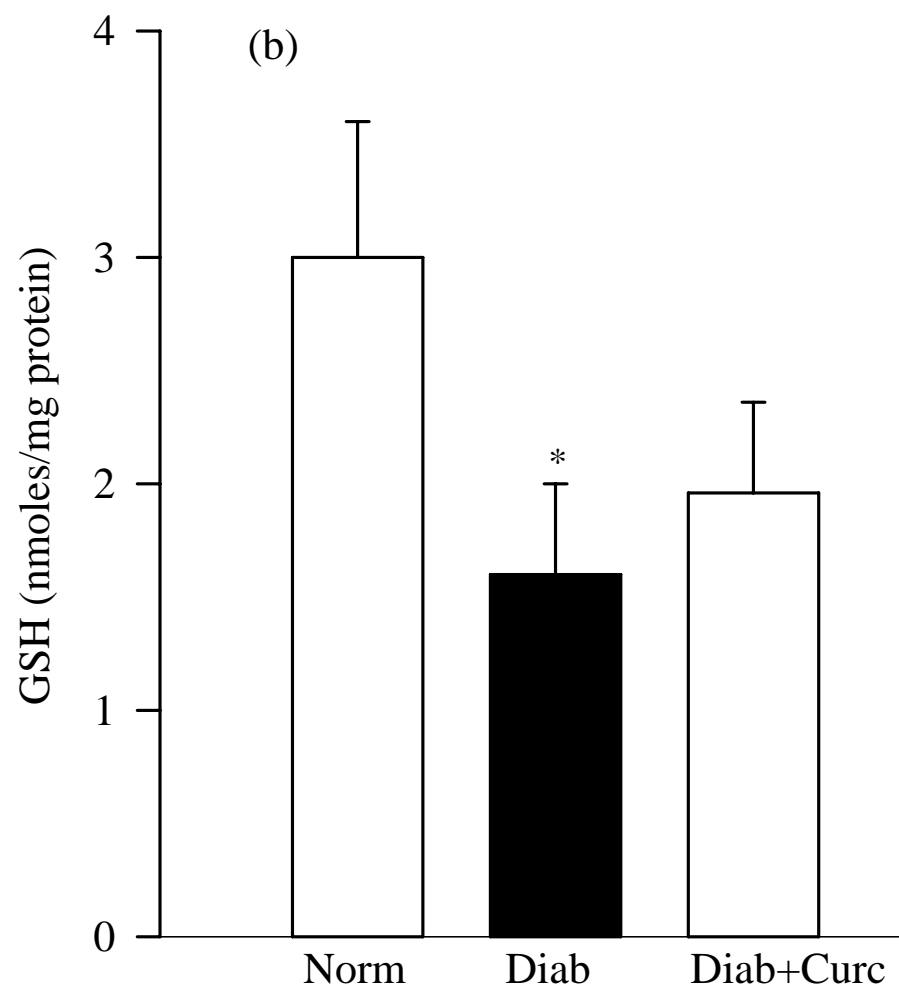

Supplement: 12986_2007_103_MOESM2_ESM.pdf [file 12986_2007_103_MOESM2_ESM.pdf]
